# Supplementary material for: Identification of Novel GSK-3β Hits Using Competitive Biophysical Assays
Source: MDPI journal article supplement (doi:10.3390/ijms23073856), 2022-03-31
Supplement: s1 [file s1]

## SUPPLEMENTARY INFORMATION

### Identification of novel GSK-3 $\beta$ hits using competitive biophysical assays

*Beatrice Balboni<sup>1,2</sup>, Shailesh Kumar Tripathi<sup>1</sup>, Marina Veronesi<sup>3</sup>, Debora Russo<sup>3</sup>, Ilenia Penna<sup>3</sup>, Barbara Giabbai<sup>4</sup>, Tiziano Bandiera<sup>3</sup>, Paola Storici<sup>4</sup>, Stefania Girotto<sup>1\*</sup> and Andrea Cavalli<sup>1,2\*</sup>*

<sup>1</sup>*Computational and Chemical Biology, Istituto Italiano di Tecnologia, Via Morego 30, 16163 Genova, Italy*

<sup>2</sup>*Department of Pharmacy and Biotechnology, University of Bologna, Via Belmeloro 6, 40126 Bologna, Italy.*

<sup>3</sup>*D3 Pharmachemistry, Istituto Italiano di Tecnologia, Via Morego 30, 16163 Genova, Italy.*

<sup>4</sup>*Structural Biology Lab, Elettra Sincrotrone Trieste S.C.p.A., 34149, Basovizza, Trieste, Italy*

*\*Andrea Cavalli, Computational and Chemical Biology, Istituto Italiano di Tecnologia, Via Morego 30, 16163 Genoa, Italy, phone: +39 0102897403; Stefania Girotto, Computational and Chemical Biology, Istituto Italiano di Tecnologia, Via Morego 30, 16163 Genoa, Italy, phone: +39 0102896983*

**Email:** andrea.cavalli@iit.it, stefania.girotto@iit.it

Supplementary figures

**Supplementary Figure S1**

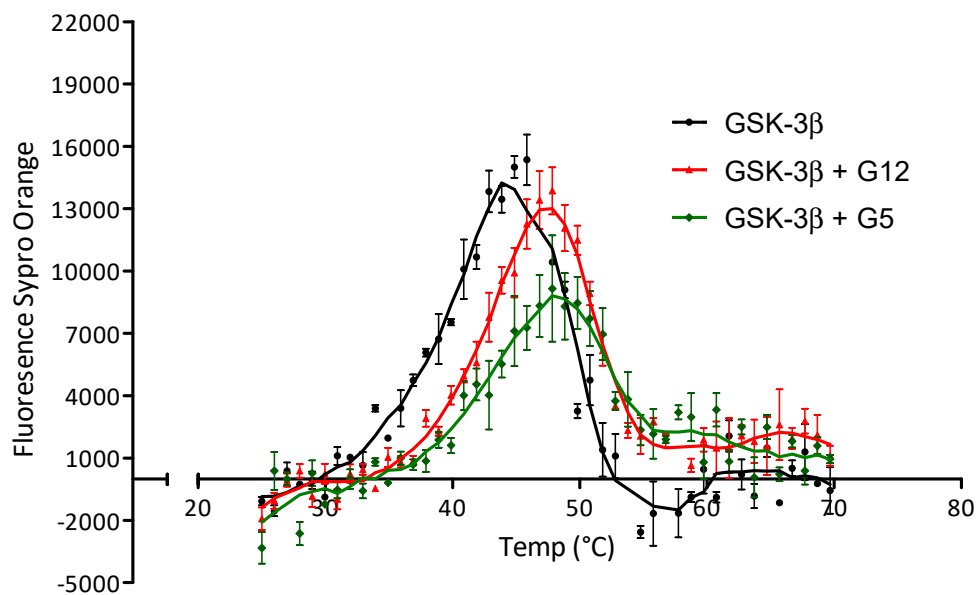

**Figure S1.** Thermal Shift Assay of GSK-3 $\beta$  alone (black trace), in the presence of G5 (green trace) and G12 (red trace) compounds. G5 and G12 stabilize GSK-3 $\beta$  protein and lead to an increase in melting temperature ( $T_m$ ) of 3.2 °C and 2.5 °C, respectively. Error bars denote Standard Deviation (SD).

### Supplementary Figure S2

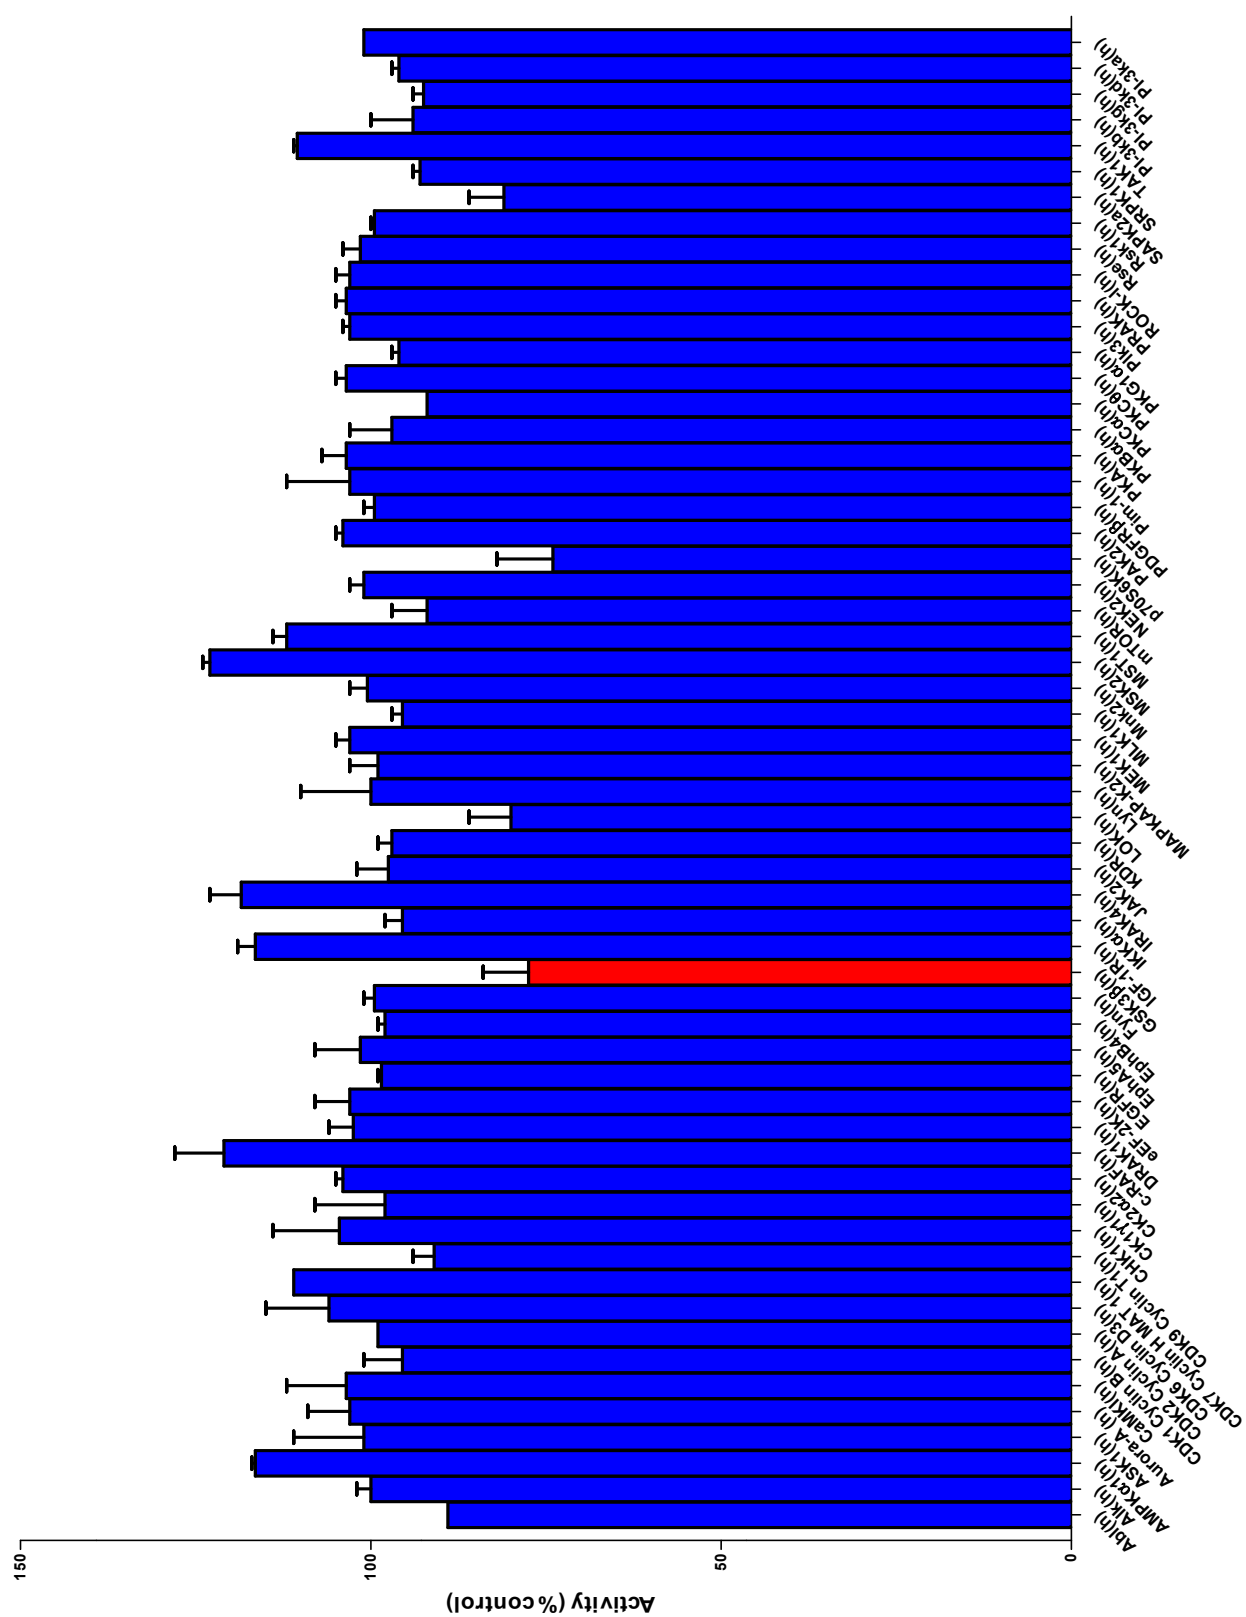

**Figure S2.** Bar Graphs showing G5 inhibitory effect on different kinases of the commercial panel (Eurofins service); all the experiments were performed using 20  $\mu\text{M}$  of compound and ATP concentrations  $\pm 15 \mu\text{M}$  of each  $K_m$ . Error bars denote SD.

### Supplementary Figure S3

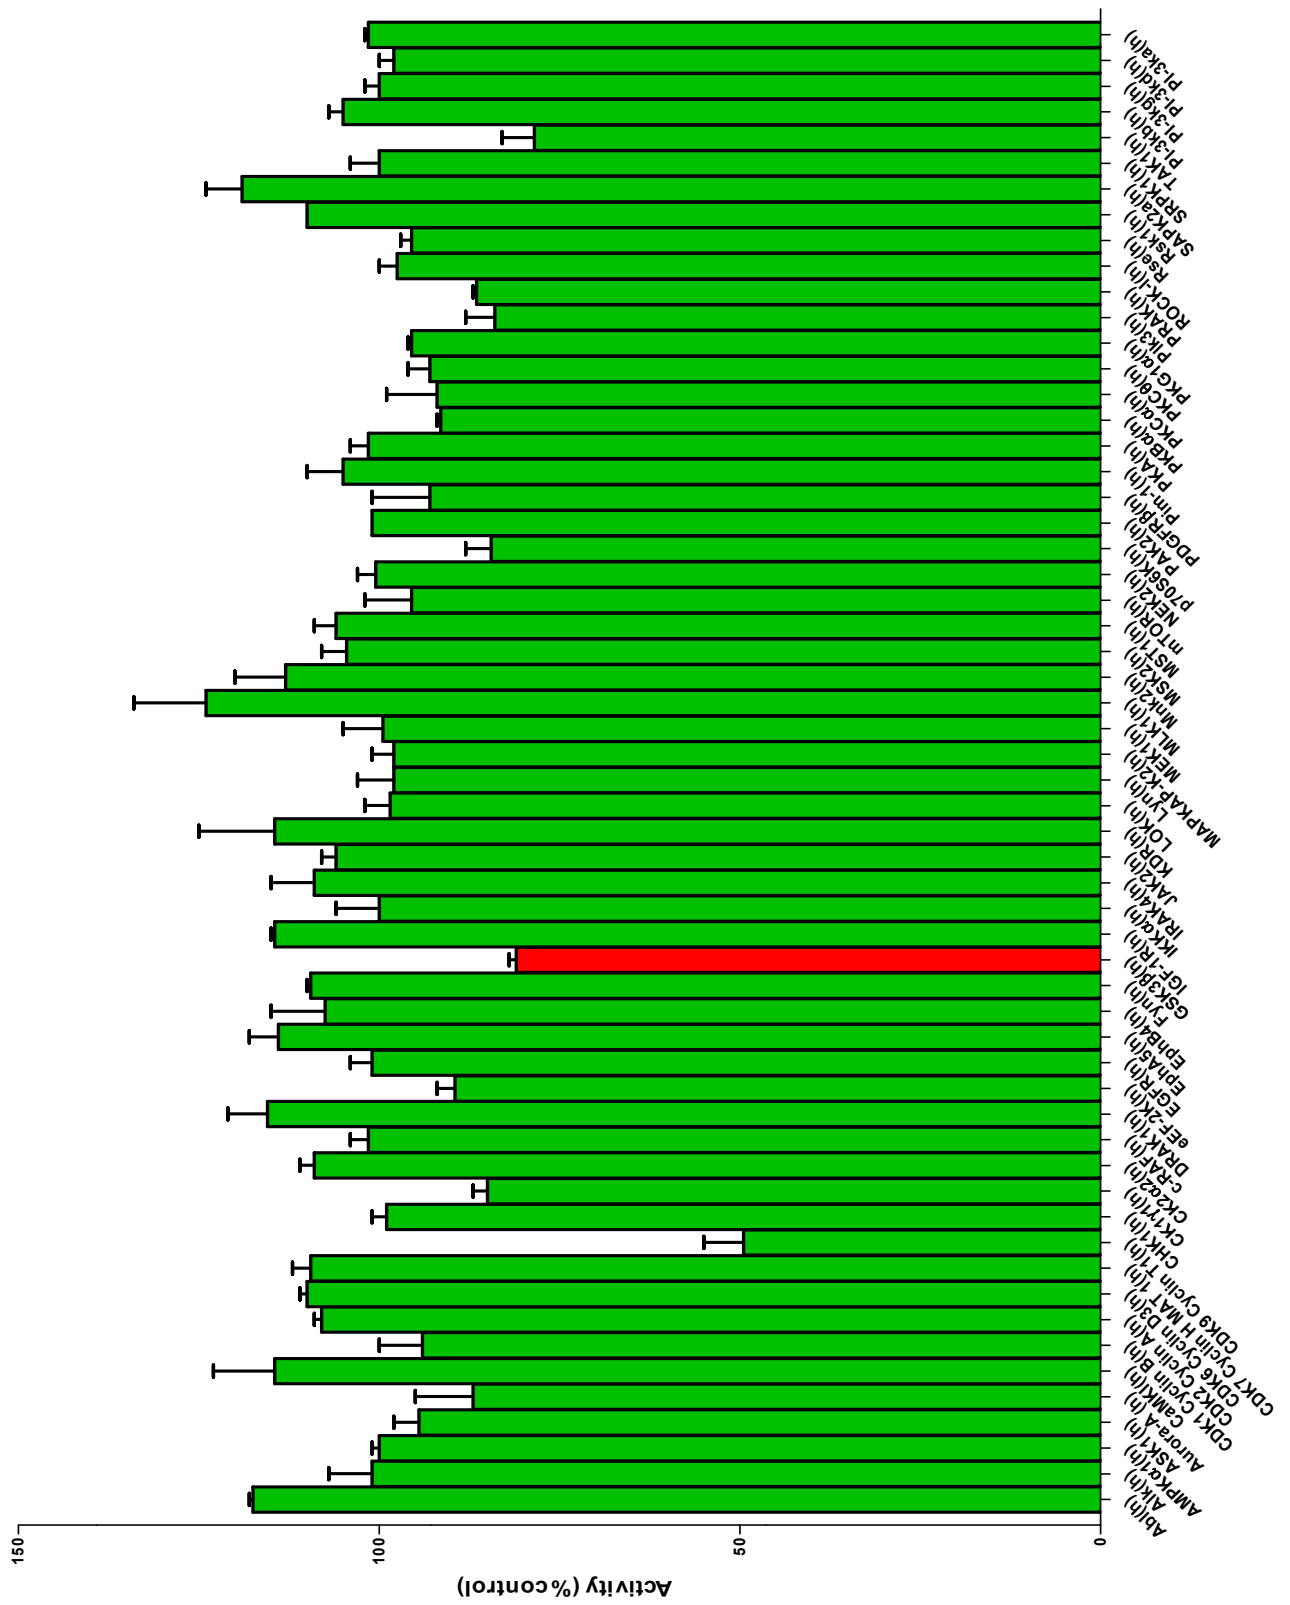

**Figure S3.** Bar Graphs showing G12 inhibitory effect on different kinases of the commercial panel (Eurofins service); all the experiments were performed using 20  $\mu\text{M}$  of compound and ATP concentrations  $\pm 15 \mu\text{M}$  of each  $K_m$ . Error bars denote SD.

### Supplementary Table

|                           | G5                  | G12               |
|---------------------------|---------------------|-------------------|
| <b>Data reduction</b>     |                     |                   |
| <b>Resolution (Å)</b>     | 2.5-48.8 (2.5-2.59) | 2.2-89 (2.2-2.26) |
| <b>Rmerge</b>             | 0.388 (3.619)       | 0.319 (3.86)      |
| <b>Mean(I/sd(I))</b>      | 7.9(0.8)            | 6.9 (0.6)         |
| <b>Completeness</b>       | 100(100)            | 95.6 (87.8)       |
| <b>Unique Reflections</b> | 44494 (4582)        | 61582(4107)       |
| <b>Multiplicity</b>       | 13.4 (12.9)         | 12.2(11.4)        |
| <b>CC<sub>1/2</sub></b>   | 0.992 (0.39)        | 0.993(0.37)       |
| <b>Refinement</b>         |                     |                   |
| <b>Resolution (Å)</b>     | 2.5-48.8            | 2.2-89            |
| <b>Rwork/Rfree</b>        | 0.225/0.268         | 0.24/0.27         |
| <b>RMS bonds (Å)</b>      | 0.0086              | 0.0075            |
| <b>RMS angles (°)</b>     | 1.808               | 1.573             |

**Table S1.** Table reporting refinement statistics and values used for solving structure of GSK-3 $\beta$  in complex with G5 and G12 compounds
